# Supplementary material for: CRISPR/Cas9-Mediated Multi-Locus Promoter Engineering in ery Cluster to Improve Erythromycin Production in Saccharopolyspora erythraea
Source: MDPI journal article supplement (doi:10.3390/microorganisms11030623), 2023-02-28
Supplement: s1 [file s1]

## Supplementary Material

### **CRISPR/Cas9-mediated multi-locus promoter engineering in *ery* cluster to improve erythromycin production in *Saccharopolyspora erythraea***

Xuemei Zhang<sup>1,2,3,4</sup>, Yan Wang<sup>2,3,5</sup>, Yue Zhang<sup>2,3,4\*</sup>, Meng Wang<sup>1,2,3,4\*</sup>

<sup>1</sup>School of Life Sciences, Division of Life Sciences and Medicine, University of Science and Technology of China, Hefei 230026, China

<sup>2</sup>Tianjin Institute of Industrial Biotechnology, Chinese Academy of Sciences, Tianjin 300308, China

<sup>3</sup>Key Laboratory of Engineering Biology for Low-Carbon Manufacturing, Tianjin Institute of Industrial Biotechnology, Chinese Academy of Sciences, Tianjin 300308, China

<sup>4</sup>Key Laboratory of Systems Microbial Biotechnology, Chinese Academy of Sciences, Tianjin 300308, China

<sup>5</sup>College of Biotechnology, Tianjin University of Science and Technology, Tianjin 300457, China

\*Corresponding authors:

Dr. Yue Zhang, E-mail: zhangy@tib.cas.cn; Dr. Meng Wang, E-mail: wangmeng@tib.cas.cn

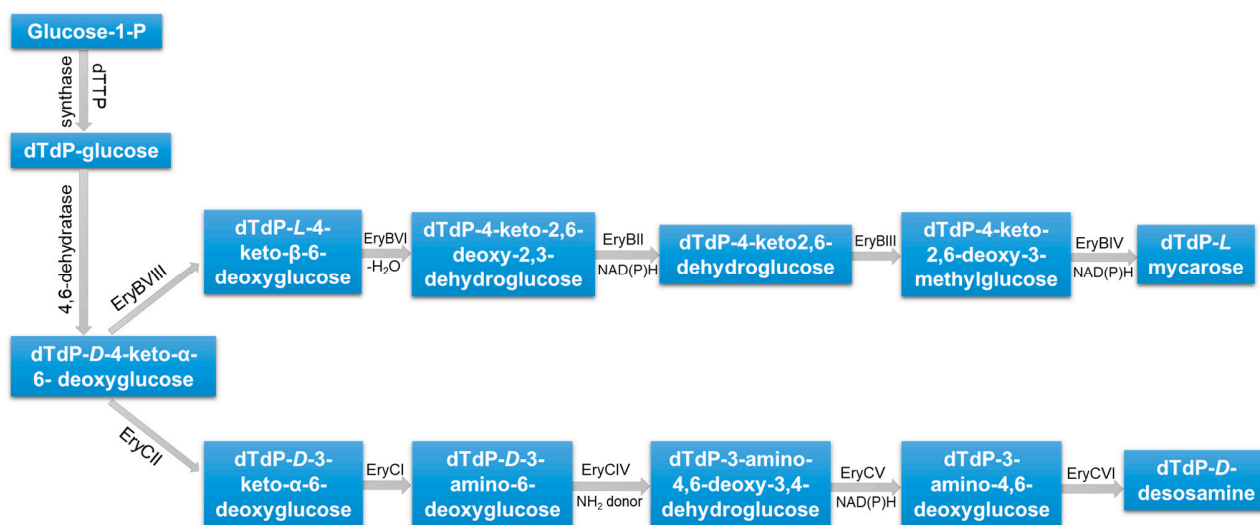

**Figure S1.** The biosynthetic mechanism of *L*-mycarose and *S*-desosamine.

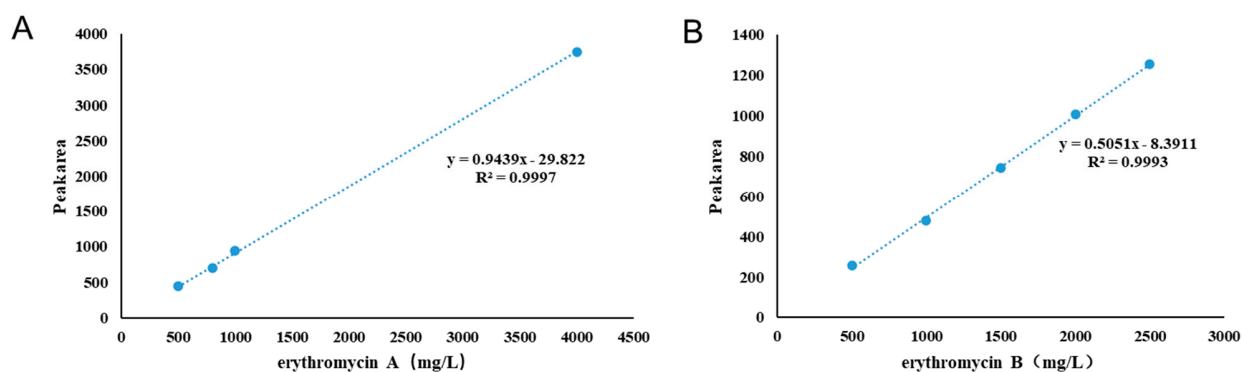

**Figure S2.** HPLC standard curves of erythromycin A (A) and B (B).



**Table S1.** Strains and plasmids used in this study.

| Strain and plasmid                            | Characteristics                                                                                                  | Source     |
|-----------------------------------------------|------------------------------------------------------------------------------------------------------------------|------------|
| <b>Strain</b>                                 |                                                                                                                  |            |
| <i>Saccharopolyspora erythraea</i> NRRL 23338 | Wild-type <i>S. erythraea</i> strain                                                                             | Lab stock  |
| <i>Escherichia coli</i> DH5α                  | Recipient strain used for plasmid construction                                                                   | Lab stock  |
| <i>Escherichia coli</i> ET12567/pUZ8002       | Helper strain used for conjugational transfer harboring plasmid pUZ8002, chloramphenicol and kanamycin resistant | Lab stock  |
| SE/0717(p <sub>2101_s32</sub> )               | <i>S. erythraea</i> harboring plasmid pCas9-0717(p <sub>2101_s32</sub> )                                         | This study |
| SE/0717(p <sub>permE*_s23</sub> )             | <i>S. erythraea</i> harboring plasmid pCas9-0717(p <sub>permE*_s23</sub> )                                       | This study |
| SE/0717(p <sub>kasO</sub> )                   | <i>S. erythraea</i> harboring plasmid pCas9-0717(p <sub>kasO</sub> )                                             | This study |
| SE/0718(p <sub>2101_s32</sub> )               | <i>S. erythraea</i> harboring plasmid pCas9-0718(p <sub>2101_s32</sub> )                                         | This study |
| SE/0718(p <sub>permE*_s23</sub> )             | <i>S. erythraea</i> harboring plasmid pCas9-0718(p <sub>permE*_s23</sub> )                                       | This study |
| SE/0720(p <sub>permE*_s23</sub> )             | <i>S. erythraea</i> harboring plasmid pCas9-0720(p <sub>permE*_s23</sub> )                                       | This study |
| SE/0720(p <sub>kasO</sub> )                   | <i>S. erythraea</i> harboring plasmid pCas9-0720(p <sub>kasO</sub> )                                             | This study |
| SE/0731(p <sub>2101_s32</sub> )               | <i>S. erythraea</i> harboring plasmid pCas9-0731(p <sub>2101_s32</sub> )                                         | This study |
| SE/0731(p <sub>permE*_s23</sub> )             | <i>S. erythraea</i> harboring plasmid pCas9-0731(p <sub>permE*_s23</sub> )                                       | This study |

|                                                                 |                                                                                                                                                                                   |            |
|-----------------------------------------------------------------|-----------------------------------------------------------------------------------------------------------------------------------------------------------------------------------|------------|
| SE/0731(p <sub>kasO</sub> )                                     | <i>S. erythraea</i> harboring plasmid pCas9-0731(p <sub>kasO</sub> )                                                                                                              | This study |
| <i>S. erythraea</i> /pSET152-p <sub>2101_s32</sub> -egfp(ATG)   | <i>S. erythraea</i> harboring plasmid pSET152-p <sub>2101_s32</sub> -egfp(ATG), hygromycin resistant                                                                              | Lab stock  |
| <i>S. erythraea</i> /pSET152-p <sub>permE*_s23</sub> -egfp(ATG) | <i>S. erythraea</i> harboring plasmid pSET152-p <sub>permE*_s23</sub> -egfp(ATG), hygromycin resistant                                                                            | Lab stock  |
| <i>S. erythraea</i> /pSET152-p <sub>kasO</sub> -egfp(ATG)       | <i>S. erythraea</i> harboring plasmid pSET152-p <sub>kasO</sub> -egfp(ATG), hygromycin resistant                                                                                  | This study |
| <i>S. erythraea</i> /pSET152-p <sub>ery18-17</sub> -egfp(ATG)   | <i>S. erythraea</i> harboring plasmid pSET152-p <sub>ery18-17</sub> -egfp(ATG), hygromycin resistant                                                                              | This study |
| <i>S. erythraea</i> /pSET152-p <sub>ery19-18</sub> -egfp(ATG)   | <i>S. erythraea</i> harboring plasmid pSET152-p <sub>ery19-18</sub> -egfp(ATG), hygromycin resistant                                                                              | This study |
| <i>S. erythraea</i> /pSET152-p <sub>ery21-20</sub> -egfp(ATG)   | <i>S. erythraea</i> harboring plasmid pSET152-p <sub>ery21-20</sub> -egfp(ATG), hygromycin resistant                                                                              | This study |
| <i>S. erythraea</i> /pSET152-p <sub>ery32-31</sub> -egfp(ATG)   | <i>S. erythraea</i> harboring plasmid pSET152-p <sub>ery32-31</sub> -egfp(ATG), hygromycin resistant                                                                              | This study |
| <b>Plasmid</b>                                                  |                                                                                                                                                                                   |            |
| pCas9-0717(p <sub>2101_s32</sub> )                              | CRISPR editing plasmid used to replace the <i>SACE_0717</i> promoter with <i>p2101_s32</i> , harboring two 1-kb homologous arms (HA), <i>pSG5</i> replicon, apramycin resistant   | This study |
| pCas9-0717(p <sub>permE*_s23</sub> )                            | CRISPR editing plasmid used to replace the <i>SACE_0717</i> promoter with <i>ppermE*_s23</i> , harboring two 1-kb homologous arms (HA), <i>pSG5</i> replicon, apramycin resistant | This study |

|                                      |                                                                                                                                                                                              |            |
|--------------------------------------|----------------------------------------------------------------------------------------------------------------------------------------------------------------------------------------------|------------|
| pCas9-0717(p <sub>kasO</sub> )       | CRISPR editing plasmid used to replace the <i>SACE_0717</i> promoter with <i>p<sub>kasO</sub></i> , harboring two 1-kb homologous arms (HA), <i>pSG5</i> replicon, apramycin resistant       | This study |
| pCas9-0718(p <sub>2101_s32</sub> )   | CRISPR editing plasmid used to replace the <i>SACE_0718</i> promoter with <i>p<sub>2101_s32</sub></i> , harboring two 1-kb homologous arms (HA), <i>pSG5</i> replicon, apramycin resistant   | This study |
| pCas9-0718(p <sub>permE*_s23</sub> ) | CRISPR editing plasmid used to replace the <i>SACE_0718</i> promoter with <i>p<sub>permE*_s23</sub></i> , harboring two 1-kb homologous arms (HA), <i>pSG5</i> replicon, apramycin resistant | This study |
| pCas9-0720(p <sub>permE*_s23</sub> ) | CRISPR editing plasmid used to replace the <i>SACE_0720</i> promoter with <i>p<sub>permE*_s23</sub></i> , harboring two 1-kb homologous arms (HA), <i>pSG5</i> replicon, apramycin resistant | This study |
| pCas9-0720(p <sub>kasO</sub> )       | CRISPR editing plasmid used to replace the <i>SACE_0720</i> promoter with <i>p<sub>kasO</sub></i> , harboring two 1-kb homologous arms (HA), <i>pSG5</i> replicon, apramycin resistant       | This study |
| pCas9-0731(p <sub>2101_s32</sub> )   | CRISPR editing plasmid used to replace the <i>SACE_0731</i> promoter with <i>p<sub>2101_s32</sub></i> , harboring two 1-kb homologous arms (HA), <i>pSG5</i> replicon, apramycin resistant   | This study |
| pCas9-0731(p <sub>permE*_s23</sub> ) | CRISPR editing plasmid used to replace the <i>SACE_0731</i> promoter with <i>p<sub>permE*_s23</sub></i> , harboring two 1-kb homologous arms (HA), <i>pSG5</i> replicon, apramycin resistant | This study |
| pCas9-0731(p <sub>kasO</sub> )       | CRISPR editing plasmid used to replace the <i>SACE_0731</i> promoter with <i>p<sub>kasO</sub></i> , harboring two 1-kb homologous arms (HA), <i>pSG5</i> replicon, apramycin                 | This study |

---

|                                                |                                                                                                             |            |
|------------------------------------------------|-------------------------------------------------------------------------------------------------------------|------------|
|                                                | resistant                                                                                                   |            |
| pSET152-p <sub>2101_s32</sub> -<br>egfp(ATG)   | Integrated plasmid harboring <i>p<sub>2101_s32</sub>-<br/>egfp</i> reporter gene, hygromycin<br>resistant   | Lab stock  |
| pSET152-p <sub>permE*_s23</sub> -<br>egfp(ATG) | Integrated plasmid harboring <i>p<sub>permE*_s23</sub>-<br/>egfp</i> reporter gene, hygromycin<br>resistant | Lab stock  |
| pSET152-p <sub>kasO</sub> - egfp(ATG)          | Integrated plasmid harboring <i>p<sub>kasO</sub>-<br/>egfp</i> reporter gene, hygromycin<br>resistant       | This study |
| pSET152- p <sub>ery18-17</sub> -<br>egfp(ATG)  | Integrated plasmid harboring <i>p<sub>ery18-17</sub>-<br/>egfp</i> reporter gene, hygromycin<br>resistant   | This study |
| pSET152- p <sub>ery19-18</sub> -<br>egfp(ATG)  | Integrated plasmid harboring <i>p<sub>ery19-18</sub>-<br/>egfp</i> reporter gene, hygromycin<br>resistant   | This study |
| pSET152- p <sub>ery21-20</sub> -<br>egfp(ATG)  | Integrated plasmid harboring <i>p<sub>ery21-20</sub>-<br/>egfp</i> reporter gene, hygromycin<br>resistant   | This study |
| pSET152- p <sub>ery32-31</sub> -<br>egfp(ATG)  | Integrated plasmid harboring <i>p<sub>ery32-31</sub>-<br/>egfp</i> reporter gene, hygromycin<br>resistant   | This study |

---

**Table S2.** Primes used in this study.

| Purpose                              | Primer name                        | Sequence (5'-3')                               |
|--------------------------------------|------------------------------------|------------------------------------------------|
| <b>Promoter engineering</b>          |                                    |                                                |
| <b>For plasmid construction</b>      | pCas9-0717(p <sub>2101_s32</sub> ) | UDGbb-F<br>GGCCAGGAACCGTAAAAAGG                |
|                                      | pCRIS-1R                           | CAGACGTAGTCCTTGGTGAGAC<br>TCCGCCCC             |
|                                      | pCRIS-2F                           | CAGACGTAGTCCTTGGTGAGAC<br>TCCGCCCC             |
|                                      | Cas9(QC)-R                         | GCGGGGAACGCGTAGATCTG                           |
|                                      | ccdB-F2                            | CAGATCTACGCGTTCCCCGC                           |
|                                      | 18p17-upHA-R                       | TCATCCGCGCACACCGACGAA                          |
|                                      | 18p17-2101p_mut1-F                 | TTCGTCGGTGTGCGCGGATGAA<br>GTCCGAGTTCGACGCGACCG |
|                                      | 18p17-2101p_mut1-R                 | TTGTCGATCAAGACCCGCACGT<br>GAGTGGCTCCTGCTCCTC   |
|                                      | 18p17-downHA-F                     | GTGCGGGTCTTGATCGACAACG<br>CC                   |
|                                      | 18p17-downHA-R                     | CCTTTTTACGGTTCCTGGCCTTC<br>TTCTCCTCGTGCTCGAT   |
| pCas9-0717(p <sub>permE*_s23</sub> ) | UDGbb-F                            | GGCCAGGAACCGTAAAAAGG                           |
|                                      | pCRIS-1R                           | CAGACGTAGTCCTTGGTGAGAC<br>TCCGCCCC             |
|                                      | pCRIS-2F                           | CAGACGTAGTCCTTGGTGAGAC<br>TCCGCCCC             |



---

|                                |                |                                                |
|--------------------------------|----------------|------------------------------------------------|
|                                | Cas9(QC)-R     | GCGGGGAACGCGTAGATCTG                           |
|                                | ccdB-F2        | CAGATCTACGCGTTCCCCGC                           |
|                                | 18p17-sgRNA-R  | TGACCGGACCCTTACAGTGAGC<br>GTATCCCCTTTCAGATAC   |
|                                | 18p17-sgRNA-F  | TCACTGTAAGGGTCCGGTCAGTT<br>TTAGAGCTAGAAATAGC   |
|                                | ccdB-R2        | TCTAGATAAAAAACGCCCCG                           |
|                                | 18p17-upHA-F   | CCGGGCGTTTTTTATCTAGACCG<br>CAAATATCAGTTGCACA   |
|                                | 18p17-upHA-R   | TGCTCGGGTCGGGCTGGTACCTC<br>ATCCGCGCACACCGACGAA |
|                                | ermEp_mut1-F   | GGTACCAGCCCGACCCGAGCA                          |
|                                | ermEp_mut1-R   | GTGGTGTCTACCAACCGGC                            |
|                                | 18p17-downHA-F | GCCGGTTGGTAGGACACCACGT<br>GCGGGTCTTGATCGACAA   |
|                                | 18p17-downHA-R | CCTTTTTACGGTTCCTGGCCTTC<br>TTCTCCTCGTGCTCGAT   |
| pCas9-0717(p <sub>kasO</sub> ) | UDGbb-F        | GGCCAGGAACCGTAAAAAGG                           |
|                                | pCRIS-1R       | CAGACGTAGTCCTTGGTGAGAC<br>TCCGCCCC             |
|                                | pCRIS-2F       | CAGACGTAGTCCTTGGTGAGAC<br>TCCGCCCC             |
|                                | Cas9(QC)-R     | GCGGGGAACGCGTAGATCTG                           |
|                                | ccdB-F2        | CAGATCTACGCGTTCCCCGC                           |
|                                | 18p17-upHA-R   | TCATCCGCGCACACCGACGAA                          |

---

---

|                       |                    |                                                             |
|-----------------------|--------------------|-------------------------------------------------------------|
|                       | 18p17-KasOp_mut1-F | TTCGTCGGTGTGCGCGGATGATG<br>TTCACATTCGAACGGTCTCTG            |
|                       | 18p17-KasOp_mut1-R | TTCGTCGGTGTGCGCGGATGATG<br>TTCACATTCGAACGGTCTCTG            |
|                       | 18p17-downHA-F     | GTGCGGGTCTTGATCGACAACG<br>CC                                |
|                       | 18p17-downHA-R     | CCTTTTACGGTTCCTGGCCTTC<br>TTCTCCTCGTGCTCGAT                 |
| pCas9-0718(p2101_s32) | UDGbb-F            | GGCCAGGAACCGTAAAAAGG                                        |
|                       | pCRIS-1R           | CAGACGTAGTCCTTGGTGAGAC<br>TCCGCCCC                          |
|                       | pCRIS-2F           | CAGACGTAGTCCTTGGTGAGAC<br>TCCGCCCC                          |
|                       | Cas9(QC)-R         | GCGGGGAACGCGTAGATCTG                                        |
|                       | ccdB-F2            | CAGATCTACGCGTTCCCCGC                                        |
|                       | 19p18-sgRNA-R      | ACCGACAAGTCCGTCGGACAGC<br>GTATCCCCTTTCAGATAC                |
|                       | 19p18-sgRNA-F      | TGTCGGACGGACTTGTCGGTGTT<br>TTAGAGCTAGAAATAGC                |
|                       | ccdB-R2            | TCTAGATAAAAAACGCCCGG                                        |
|                       | 19p18-upHA-F       | CCGGGCGTTTTTATCTAGACTA<br>CTCCTTCTACCTGGACTTCTA             |
|                       | 19p18-upHA-R       | GGTCGCGTCGAACTCGGACTCT<br>AGCCGGCGTGGCGGCGGTGAG<br>TTCCTCCA |
|                       | 2101p_mut1-F       | AGTCCGAGTTCGACGCGACC                                        |
|                       | 2101p_mut1-R       | GTGAGTGGCTCCTGCTCCTC                                        |

---

|                                     |                      |                                                               |
|-------------------------------------|----------------------|---------------------------------------------------------------|
| pCas9-0718(p <sub>ermE*</sub> _s23) | 19p18-downHA-F       | GAGGAGCAGGAGCCACTCACAT<br>GTACGAGGGCGGGTTCGCCGAG<br>CTTT      |
|                                     | 19p18-downHA-R       | CCTTTTTACGGTTCCTGGCCTGG<br>AACGACCAGCGGTCCAT                  |
|                                     | UDGbb-F              | GGCCAGGAACCGTAAAAAGG                                          |
|                                     | pCRIS-1R             | CAGACGTAGTCCTTGGTGAGAC<br>TCCGCCCC                            |
|                                     | pCRIS-2F             | CAGACGTAGTCCTTGGTGAGAC<br>TCCGCCCC                            |
|                                     | Cas9(QC)-R           | GCGGGGAACGCGTAGATCTG                                          |
|                                     | ccdB-F2              | CAGATCTACGCGTTCCCCGC                                          |
|                                     | 19p18-upHA-R         | CTAGCCGGCGTGCGCGGCGCGTG<br>AGTTCCTCCA                         |
|                                     | 19p18- ermEp _mut1-F | TGGAGGAACTCACGCGCCGCCA<br>CGCCGGCTAGGGTACCAGCCCG<br>ACCCGAGCA |
|                                     | 19p18- ermEp _mut1-R | AAAGCTCGGCGAACCCGCCCTC<br>GTACATGTGGTGTCTACCAACC<br>GGC       |
| pCas9-0720(p <sub>ermE*</sub> _s23) | 19p18-downHA-F       | ATGTACGAGGGCGGGTTCGCCG<br>AGCTTT                              |
|                                     | 19p18-downHA-R       | CCTTTTTACGGTTCCTGGCCTGG<br>AACGACCAGCGGTCCAT                  |
|                                     | UDGbb-F              | GGCCAGGAACCGTAAAAAGG                                          |
|                                     | pCRIS-1R             | CAGACGTAGTCCTTGGTGAGAC<br>TCCGCCCC                            |
|                                     | pCRIS-2F             | CAGACGTAGTCCTTGGTGAGAC<br>TCCGCCCC                            |

|                                |                      |                                                  |
|--------------------------------|----------------------|--------------------------------------------------|
|                                | Cas9(QC)-R           | GCGGGGAACGCGTAGATCTG                             |
|                                | ccdB-F2              | CAGATCTACGCGTTCCCCGC                             |
|                                | 21p20-upHA-R         | CGGAGCATTGCTCGCTTTC                              |
|                                | 21p20- ermEp _mut1-F | GAAAGCGAGCAAATGCTCCGGG<br>TACCAGCCCGACCCGAGCA    |
|                                | 21p20- ermEp _mut1-R | CGGGGAATCACTGATCCCATT<br>ACGTGGTGTCTACCAACCGGC   |
|                                | 21p20-downHA-F       | GTGAATGGGATCAGTGATTCCC<br>CG                     |
|                                | 21p20-downHA-R       | CCTTTTTACGGTTCCTGGCCACC<br>AGTCCCTGGAAGTGCGT     |
|                                | UDGbb-F              | GGCCAGGAACCGTAAAAAGG                             |
|                                | pCRIS-1R             | CAGACGTAGTCCTTGGTGAGAC<br>TCCGCCCC               |
|                                | pCRIS-2F             | CAGACGTAGTCCTTGGTGAGAC<br>TCCGCCCC               |
| pCas9-0720(p <sub>kasO</sub> ) | Cas9(QC)-R           | GCGGGGAACGCGTAGATCTG                             |
|                                | ccdB-F2              | CAGATCTACGCGTTCCCCGC                             |
|                                | 21p20-upHA-R         | CGGAGCATTGCTCGCTTTC                              |
|                                | 21p20-KasOp _mut1-F  | GAAAGCGAGCAAATGCTCCGTGTT<br>CACATTGGAACGGTCTCTGC |
|                                | 21p20-KasOp _mut1-R  | CGGGGAATCACTGATCCCATTAC<br>AACTCCCCCAGTCCTGCAC   |
|                                | 21p20-downHA-F       | GTGAATGGGATCAGTGATTCCC<br>CG                     |
|                                | 21p20-downHA-R       | CCTTTTTACGGTTCCTGGCCACC<br>AGTCCCTGGAAGTGCGT     |
|                                |                      |                                                  |

|                                      |                      |                                                   |
|--------------------------------------|----------------------|---------------------------------------------------|
| pCas9-0731(p <sub>2101_s32</sub> )   | UDGbb-F              | GGCCAGGAACCGTAAAAAGG                              |
|                                      | pCRIS-1R             | CAGACGTAGTCCTTGGTGAGAC<br>TCCGCCCC                |
|                                      | pCRIS-2F             | CAGACGTAGTCCTTGGTGAGAC<br>TCCGCCCC                |
|                                      | Cas9(QC)-R           | GCGGGGAACGCGTAGATCTG                              |
|                                      | ccdB-F2              | CAGATCTACGCGTTCCCCGC                              |
|                                      | 32p31-upHA-R         | CACAAGGAAGATCATAACGAGC<br>GC                      |
|                                      | 32p31- 2101p _mut1-F | GCGCTCGTTATGATCTTCCTTGT<br>GAGTCCGAGTTCGACGCGACCG |
|                                      | 32p31- 2101p _mut1-R | GCCTAGTCCCACAAGGAAGATC<br>ATGTGAGTGGCTCCTGCTCCTC  |
|                                      | 32p31-downHA-F       | ATGATCTTCCTTGTGGGACTAGG<br>C                      |
| pCas9-0731(p <sub>permE*_s23</sub> ) | UDGbb-F              | GGCCAGGAACCGTAAAAAGG                              |
|                                      | pCRIS-1R             | CAGACGTAGTCCTTGGTGAGAC<br>TCCGCCCC                |
|                                      | pCRIS-2F             | CAGACGTAGTCCTTGGTGAGAC<br>TCCGCCCC                |
|                                      | Cas9(QC)-R           | GCGGGGAACGCGTAGATCTG                              |
|                                      | ccdB-F2              | CAGATCTACGCGTTCCCCGC                              |
|                                      | 32p31-sgRNA-R        | CATATGCGGCATTTGCCTAGGCG<br>TATCCCCTTTCAGATAC      |

|                                |                    |                                                         |
|--------------------------------|--------------------|---------------------------------------------------------|
|                                | 32p31-sgRNA-F      | CTAGGCAAATGCCGCATATGGT<br>TTTAGAGCTAGAAATAGC            |
|                                | ccdB-R2            | TCTAGATAAAAAACGCCCGG                                    |
|                                | 32p31-upHA-F       | CCGGGCGTTTTTTATCTAGATCC<br>CGGATGGCCTTCTTCAG            |
|                                | 32p31-upHA-R       | TGCTCGGGTCGGGCTGGTACCC<br>ACAAGGAAGATCATAACGA           |
|                                | ermEp_mut1-F       | GGTACCAGCCCGACCCGAGCA                                   |
|                                | ermEp_mut1-R       | GTGGTGTCTTACCAACCGGC                                    |
|                                | 32p31-downHA-F     | GCCGGTTGGTAGGACACCACAT<br>GATCTTCCTTGTGGGACT            |
|                                | 32p31-downHA-R     | CCTTTTTACGGTTCCTGGCCTCA<br>TACGACTTCCAGTCGGG            |
| pCas9-0731(p <sub>kasO</sub> ) | UDGbb-F            | GGCCAGGAACCGTAAAAAGG                                    |
|                                | pCRIS-1R           | CAGACGTAGTCCTTGGTGAGAC<br>TCCGCCCC                      |
|                                | pCRIS-2F           | CAGACGTAGTCCTTGGTGAGAC<br>TCCGCCCC                      |
|                                | Cas9(QC)-R         | GCGGGGAACGCGTAGATCTG                                    |
|                                | ccdB-F2            | CAGATCTACGCGTTCCCCGC                                    |
|                                | 32p31-upHA-R       | CACAAGGAAGATCATAACGAGC<br>GC                            |
|                                | 32p31-KasOp_mut1-F | CGCTCGTTATGATCTTCCTTGTG<br>TGTTACATTCTGAACGGTCTCTG<br>C |
|                                | 32p31-KasOp_mut1-R | GCCTAGTCCCACAAGGAAGATC<br>ATAACTCCCCCAGTCCTGCAC         |
|                                |                    |                                                         |
|                                |                    |                                                         |

|                                               |                                 |                                                                     |
|-----------------------------------------------|---------------------------------|---------------------------------------------------------------------|
|                                               | 32p31-downHA-F                  | ATGATCTTCCTTGTGGGACTAGG<br>C                                        |
|                                               | 32p31-downHA-R                  | CCTTTTTACGGTTCCTGGCCTCA<br>TACGACTTCCAGTCGGG                        |
| pSET152-p <sub>kasO</sub> -<br>egfp(ATG)      | pSET152-F                       | CGCGGCCGCGCGCGATATCG                                                |
|                                               | pSET152-R                       | CAGCCCAAGCTTGGCACTGG                                                |
|                                               | p <sub>kasO</sub> -egfp(ATG)-F2 | CCAGTGCCAAGCTTGGGCTGTGT<br>TCACATTCGAACGGTCTCTGCTT<br>TGACAACATGCTG |
|                                               | egfp-R                          | CGATATCGCGCGCGGCCGCGTT<br>ACTTGTACAGCTCGTCCA                        |
|                                               |                                 |                                                                     |
| pSET152- p <sub>ery18-17</sub> -<br>egfp(ATG) | pSET152-F                       | CGCGGCCGCGCGCGATATCG                                                |
|                                               | pSET152-R                       | CAGCCCAAGCTTGGCACTGG                                                |
|                                               | egfp-F                          | ATGGTCAGCAAGGGCGAGG                                                 |
|                                               | egfp-R                          | CGATATCGCGCGCGGCCGCGTT<br>ACTTGTACAGCTCGTCCA                        |
|                                               |                                 |                                                                     |
|                                               | ery 18p17-F                     | CCAGTGCCAAGCTTGGGCTGCC<br>CGTGCGTTCGCGTTTTCC                        |
|                                               | ery 18p17-R                     | CCTCGCCCTTGCTGACCATTAC<br>TGTAAGGGTCCGGTCAC                         |
| pSET152- p <sub>ery19-18</sub> -<br>egfp(ATG) | pSET152-F                       | CGCGGCCGCGCGCGATATCG                                                |
|                                               | pSET152-R                       | CAGCCCAAGCTTGGCACTGG                                                |
|                                               | egfp-F                          | ATGGTCAGCAAGGGCGAGG                                                 |
|                                               | egfp-R                          | CGATATCGCGCGCGGCCGCGTT<br>ACTTGTACAGCTCGTCCA                        |

|                                               |              |                                                   |
|-----------------------------------------------|--------------|---------------------------------------------------|
| pSET152- p <sub>ery21-20</sub> -<br>egfp(ATG) | ery 19p18-F  | CCAGTGCCAAGCTTGGGCTGCG<br>GTTTCCGACCGACAAGTC      |
|                                               | ery 19p18-R  | CCTCGCCCTTGCTGACCATCCCT<br>GCTCCCTCCGGAGGTG       |
|                                               | pSET152-F    | CGCGGCCGCGCGCGATATCG                              |
|                                               | pSET152-R    | CAGCCCAAGCTTGGCACTGG                              |
|                                               | egfp-F       | ATGGTCAGCAAGGGCGAGG                               |
|                                               | egfp-R       | CGATATCGCGCGCGGCCGCGTT<br>ACTTGTACAGCTCGTCCA      |
| pSET152- p <sub>ery32-31</sub> -<br>egfp(ATG) | ery 21p20-F  | CCAGTGCCAAGCTTGGGCTGGC<br>GTCCCCCTACTCGACGAC      |
|                                               | ery 21p20-R  | CCTCGCCCTTGCTGACCATCGGA<br>GCATTTGCTCGCTTTC       |
|                                               | egfp-F       | ATGGTCAGCAAGGGCGAGG                               |
|                                               | pSET152-R    | CAGCCCAAGCTTGGCACTGG                              |
| <b>For transformant<br/>verification</b>      | ery 32p31-F  | CCAGTGCCAAGCTTGGGCTGGC<br>AAACAATTTTCAGCTTGATCAAC |
|                                               | ery 32p31-R  | CCTCGCCCTTGCTGACCATAACG<br>AGCGCGGCGCCGCGG        |
|                                               | 2101p_mut1-F | CCGAGTTCGACGCGACCGTG                              |
|                                               | 2101p_mut1-R | GTGAGTGGCTCCTGCTCCTC                              |
|                                               | ermEp_mut1-F | GGTACCAGCCCGACCCGAGCA                             |
|                                               | ermEp_mut1-R | GTGGTGTCTCTACCAACCGGC                             |
|                                               | KasOp_mut1-F | TGTTACATTTCGAACGGTCTCTG<br>C                      |
|                                               | KasOp_mut1-R |                                                   |



---

|                |              |                         |
|----------------|--------------|-------------------------|
|                |              | AACTCCCCCAGTCCTGCAC     |
|                | 18p17-QCYZ-F | GAATGGAAACCGTTGTGCGCG   |
|                | 18P17-QCYZ-R | GATGTCCTTGACCAGCAGGGC   |
|                | 19p18-QCYZ-F | CACTTCCAGGGACTGGTCCC    |
|                | 19P18-QCYZ-R | GATGATGGGCTGGATCCAGTCC  |
|                | 21p20-QCYZ-F | CTCGCTTCGACGAACGTGCC    |
|                | 21p20-QCYZ-R | ACTTCCGGGACGATGTGCGAAC  |
|                | 32p31-QCYZ-F | TTGGCGAAGTCGGGCTCGA     |
|                | 32p31-QCYZ-R | CTTCTTCTTCGGGTCGCTGC    |
| <b>qRT-PCR</b> |              |                         |
| Gene-SACE_0716 | 16RT-F       | ATTCCTGCACACCCTCTACGT   |
|                | 16RT-R       | TCGAACTCGCGCACCAGTG     |
| Gene-SACE_0717 | 17RT-F       | TCGACGACACCGCAGGGAGA    |
|                | 17RT-R       | GTCAGCCAGTCGTGGGTTTCC   |
| Gene-SACE_0718 | 18RT-F       | TCGCCGAGCTTTACGACCG     |
|                | 18RT-R       | CAGCCCGGTCACGTCGTC      |
| Gene-SACE_0719 | 19RT-F       | ACTTCCAGGGACTGGTCCCCG   |
|                | 19RT-F       | ACTTCCGGGACGATGTGCGAACA |
| Gene-SACE_0720 | 20RT-F1      | CGCGTCAATTGATCACCCCTT   |
|                | 20RT-R1      | ACCAGGTGCACGATCACGTC    |
| Gene-SACE_0731 | 31RT-F       | CAAATGCCGCATATGCGGGA    |
|                | 31RT-R       | GCGCACTTGACCAGTTCGAG    |

---

|                |               |                       |
|----------------|---------------|-----------------------|
| Reference gene | sigA (1801)-F | TCTTGGCCGCAGAACTCTTG  |
|                | sigA (1801)-R | TCCAGCTCCGCTGCAAACCTC |

**Table S3.** Sequences of the promoters used in this study.

| Gene number       | Sequence (5'-3')                                                                                                                                                                                                                                                                                                                                                         | Length(bp) |
|-------------------|--------------------------------------------------------------------------------------------------------------------------------------------------------------------------------------------------------------------------------------------------------------------------------------------------------------------------------------------------------------------------|------------|
| <i>pery18-17</i>  | CCCGTGC GTTCGCG TTTTCCG TTCCTGG CACAGG<br>TGATCCG CTCCACG GGGCCCTT TCCCCG CCGTGAC<br>CGGACCCTTACAGTGA                                                                                                                                                                                                                                                                    | 84         |
| <i>pery19-18</i>  | CGGTTTCCGACCGACAAGTCCGTCCGACAGCACA<br>CCTCCGGAGGGAGCAGGG                                                                                                                                                                                                                                                                                                                 | 52         |
| <i>pery21-20</i>  | GCGTCCCCCTACTCGACGACCACGCAATGGGCG<br>AACAATATAGGAAGGATCAAGAGGTTGACATCG<br>CCTCGTCGAGCCAACGAACCTGTGAACATCTGCA<br>TGTTGACAAGATCAACGGCGGCTACCTACTGTGG<br>TGGCCCAGTGACGGGTTGCCGCACATCGCGCTGG<br>GGAGATTCTTTGAATTTGCCCCGTAGCACCGACC<br>TGAAAGCGAGCAAATGCTCCG                                                                                                                  | 224        |
| <i>pery32-31</i>  | GCAAACAATTTTCAGCTTGATCAACCTAACACCG<br>GCGCGCGGTGCCGACACGGACTTTTCGGACGCC<br>GCTCCTCGGCCGGACATCGCAGCGGAAAGCGCG<br>ATCCACAATGGACGCAACGGGAGTCGTAAACCG<br>GCTGATGTGATCCAGGACACAAAGCTCGACGGG<br>TTGGCCGCGGCGCCGCGCTCGTT                                                                                                                                                        | 189        |
| <i>p2101_s32</i>  | AGTCCGAGTTCGACGCGACCGTGGTCAACGCCG<br>ACGTGCGGTTCGGCGACCAGCGAATTGATAGGAT<br>TGGTGGTTCGGCCGCCAACGGTGAGACCGTTTGA<br>CGCGGACCGGGGCGACCCGGTTCGCGCCGACGC<br>GCAGCCGGACGGGGGCGGTTCGGACGGCTGCCGC<br>CGAGCGGACCACGCCAGCGAGCCCGGCCCGCC<br>AGGACCGGCCCCGGCCGGGCCTGGAGCCGGTTCG<br>GCACTGCCGGACGCCCGCCGCGCCCGTCGGCGC<br>ACAAGCCGAGAGCCGGCACCGGTGCCCGTTTGG<br>CCACGAGGAGCAGGAGCCACTCAC | 321        |
| <i>permE*_s23</i> | GGTACCAGCCCGACCCGAGCACGCGCCGGCACG<br>CCTGGTCGATGTCGGACCGGAGTTCGAGGTACGC                                                                                                                                                                                                                                                                                                  | 282        |

GGCTTGCAGGTCCAGGAAGGGGACGTCCATGCG  
 AGTGTCCGTTTCGAGTGGCGGCTTGCGCCCGATGC  
 TAGTCGCGGTTGATCGGCGATCGCAGGTGCACGC  
 GGTCGATCTTGACGCTCTGGGGTTGTGAAGTAGA  
 GGATCTGACCGACGCGGTCCACACGTGGCACC  
 CGATGCTGTTGTGGGCTGGACAATCGTGCCGGTT  
 GGTAGGACACCAC

*pkasO*

TGTTACATTTCGAACGGTCTCTGCTTTGACAACA  
 TGCTGTGCGGTGTTGTAAAGTCGTGGCCAGGAGA  
 ATACGACAGCGTGCAGGACTGGGGGAGTT

97

**Table S4.** Sequences of guide RNA (gRNA) used in this study.

| Target           | gRNA sequence        | PAM |
|------------------|----------------------|-----|
| <i>pery18-17</i> | TCACTGTAAGGGTCCGGTCA | CGG |
| <i>pery19-18</i> | TGTCGGACGGACTTGTCGGT | CGG |
| <i>pery21-20</i> | GCGTCAATTGATCACCTTC  | TGG |
| <i>pery32-31</i> | CTAGGCAAATGCCGCATATG | CGG |
